# Supplementary material
Source: publisher site journal article supplement (https://www.dovepress.com/article/351315)
Supplement: Supplementary file 1 [file get_supplementary_file.php]

**Sed filesAppendix 1: Questionnaire Form:**

**Sociographic part :**

***الجزء الاجتماعي:***

| 1 | **Do you want to participate and fill in the included questionnaires and complete them in complete privacy? With all transparency**  **هل ترغب في المشاركة وملئ الاستبيانات المضمنة واستكمالها بخصوصية تامة؟ بكل شفافية**   - **Yes**   **نعم**   - **No**   **لا** |
| --- | --- |
| 2 | **Sex?**  **الجنس؟**   - **Male**   **ذكر**   - **Female**   **انثى** |
| 3 | **Age in years?**  **العمر بالسنين؟**   - **18-20**   **١٨-٢٠**   - **21-30**   **٢١-٣٠**   - **31-40**   **٣١-٤٠**   - **41-50**   **٤١-٥٠**   - **51-60**   **٥١-٦٠**   - **More than 60**   **أكثر من ٦٠** |
| 4 | **If you have a child who is treated with Bee venom acupuncture therapy, how old is he/she?**  **إذا لديك طفل/ه يعالجوا بالوخز بسم النحل، كم عمره؟** |
| 5 | **Current educational level?**  **المستوى التعليمي الحالي؟**   - **Middle school certificate only**   **شهادة المرحلة المتوسطة فقط**   - **High school diploma only**   **شهادة المرحلة الثانوية فقط**   - **A post-secondary certificate, a diploma or a university bachelor's degree,**   **شهادة ما بعد الثانوية او دبلوم او بكالوريوس جامعي**   - **A postgraduate degree, such as a master's or doctorate**   **درجة الدراسات العيل مثل الماجستير او الدكتوراه** |
| 6 | **Current residential area?**  **المنطقة السكنية الحالية؟**   - **The northern region or close to it,**   **المنطقة الشمالية او القريبة منها**   - **The southern region, or close to it,**   **المنطقة الجنوبية او القريبة منها**   - **The central region, or close to it,**   **المنطقة الوسطى او القريبة منها**   - **The eastern region, or close to it,**   **المنطقة الشرقية او القريبة منها**   - **Or close to the western region**   **او بالقرب من المنطقة الغربية** |
| 7 | **What is the current job?**  **ما هي الوظيفة الحالية؟**   - **Student**   **طالب**   - **Government employee or private sector self-employed**   **موظف حكومي او موظف قطاع خاص يعمل لحسابه الخاص**   - **Retired**   **متقاعد**   - **I do not work currently**   **لا أعمل حاليا** |
| 8 | **What is your nationality?**  **ما هي جنسيتك؟**   - **Saudi**   **سعودي**   - **None Saudi**   **غير سعودي** |
| 9 | **What is weight in kilograms?**  **ما هو الوزن بالكيلوجرام؟**   - **From 50 to 60 kg**   **من ٥٠ الى ٦٠ كجم**   - **From 61 to 70 kg**   **من ٦١ الى٧٠ كجم**   - **From 71 to 90 kg**   **من ٧١ الى ٩٠ كجم**   - **More than 90 kg**   **اكثر من ٩٠ كجم** |
| 10 | **Are you a beekeeper?**  **هل انت من مربي النحل؟**   - **Yes**   **نعم**   - **No**   **لا** |
| 11 | **Clinical diagnosis part:**  ***جزء التشخيص السريري:***  **Do you suffer from any of the following chronic diseases? You can choose more than one answer**  **هل تعاني من أي من الأمراض المزمنة التالية؟ يمكنك اختيار أكثر من إجابة واحدة؟**   - **Rheumatoid arthritis**   **التهاب المفاصل الروماتويدي**   - **Osteoarthritis**   **هشاشة العمود الفقري**   - **Headache**   **صداع الراس**   - **Migraine**   **صداع نصفي**   - **Delaying pregnancy**   **تأخير الحمل**   - **Infertility**   **العقم**   - **Cancer**   **سرطان**   - **Epilepsy or Seizures**   **الصرع او النوبات**   - **Thyroid ( hyper or hypothyroidism)**   **الغدة الدرقية (خمول او نشاط الغدة الدرقية)**   - **Muscle pain**   **الم عضلي**  **Write below your disease, if it is not listed above?**  **اكتب أدناه مرضك، إذا لم يكن مذكورًا أعلاه؟** |
| 12 | **Do you take the typical medications for your disease prescribed by physician?**  **هل تتناول الأدوية النموذجية التي يصفها الطبيب لمرضك؟**   - **Yes**   **نعم**   - **No**   **لا** |
| 13 | **Was the treatment prescribed by your physician effective?**  **هل كان العلاج الذي وصفه طبيبك لك فعالاً؟**   - **Yes**   **نعم**   - **No**   **لا** |
| 14 | **Have you ever done surgery for your disease?**  **هل سبق لك إجراء جراحة لمرضك؟**   - **Yes**   **نعم**   - **No**   **لا** |
| 15 | **Do you take bee honey as routine for your health maintenances?**  **هل تتناول عسل النحل بشكل روتيني للحفاظ على صحتك؟**   - **Yes**   **نعم**   - **No**   **لا** |
| 16 | **Knowledge part:**  **الجزء التوعوي:**  **Have you heard about Bee venom acupuncture therapy?**  **هل سمعت عن علاج الوخز بسم النحل؟**   - **Yes**   **نعم**   - **No**   **لا** |
| 17 | **Do you Know someone of your family or friends tried Bee venom acupuncture therapy?**  **هل تعلم أحداً من عائلتك أو أصدقائك جرب علاج الوخز بسم النحل؟**   - **Yes**   **نعم**   - **No**   **لا**   - **Don’t know**   **لا أعلم** |
| 18 | **From where did you heard about Bee venom acupuncture therapy?**  **من أين سمعت عن علاج الوخز بسم النحل؟**   - **Family**   **الاسرة**   - **Relatives and friends**   **الأقارب و الاصدقاء**   - **Social Media**   **وسائل التواصل الاجتماعي**   - **Patients cured on this type of therapy**   **مرضى عولجوا بهذا النوع من العلاج**   - **Advertising from** **practitioner of this type of therapy**   **اعلان من ممارس لهذا النوع من العلاج** |
| 19 | **Does Bee venom acupuncture therapy has been proven to be safe in many different diseases?**  **هل ثبت أن العلاج بالوخز بسم النحل آمن في العديد من الأمراض المختلفة؟**   - **Yes, it was safe**   **نعم، لقد كان آمن**   - **No, it caused side effects**   **لا، فقد تسبب في آثار جانبية**   - **Don’t know**   **لا أعلم** |
| 20 | **Do you believe that Bee venom acupuncture therapy is effective?**  **هل تعتقد أن علاج الوخز بسم النحل فعال؟**   - **Yes**   **نعم**   - **No**   **لا**   - **Don’t know**   **لا أعلم** |
| 21 | **Which one is the most effective treatment you think?**  **ما هو العلاج الأكثر فعالية في رأيك؟**   - **Bee honey**   **عسل النحل**   - **Bee venom acupuncture**   **الوخز بسم النحل** |
| 22 | **Did you try Bee venom acupuncture therapy?**  **هل جربت علاج الوخز بسم النحل؟**   - **Yes**   **نعم**   - **No**   ***لا*** |
| 23 | **If yes, why did you try this type of treatment?**  **إذا كانت الإجابة بنعم، فلماذا جربت هذا النوع من العلاج؟**   - **You believe that this therapy is effective**   **انت تعتقد ان هذا العلاج فعال**   - **It was a recommendation from your relatives or friend treated before with this therapy.**   **لقد كانت توصية من اقاربك او صديقك الذي عولج بهذا العلاج**   - **From social media**   **من وسائل التواصل الاجتماعي**   - **It was a recommendation from your physician**   **كانت توصية من طبيبك**   - **You read published articles confirming the effectiveness of this treatment.**   **لقد قرأت مقالات منشورة تؤكد فعالية العلاج**  **Attitude part:**  **جزء السلوك:** |
| 24 | **Bee venom acupuncture therapy considered as one of the effective medications now days in Saudi Arabia.**  **يعتبر علاج الوخز بسم النحل أحد الأدوية الفعالة اليوم في المملكة العربية السعودية؟**   - **Agree**   ***موافق***   - **Disagree**   ***لا اوافق***   - **Don’t know**   **لا أعلم** |
| 25 | **Bee venom acupuncture therapy be same as Chinese acupuncture therapy**  **علاج الوخز بسم النحل هو نفس علاج الوخز بالإبر الصيني؟**   - **Agree**   ***موافق***   - **Disagree**   ***لا اوافق***   - **Don’t know**   ***لا أعلم*** |
| 26 | **Bee venom acupuncture therapy is a promising approach in treating many different diseases**  **يعد علاج الوخز بسم النحل نهجًا واعدًا في علاج العديد من الأمراض المختلفة؟**   - **Agree**   ***موافق***   - **Disagree**   ***لا اوافق***   - **Don’t know**   ***لا أعلم*** |
| 27 | **Bee venom acupuncture therapy is considered as an expensive treatment**  **يعتبر علاج الوخز بسم النحل علاجًا مكلفًا؟**   - **Agree**   ***موافق***   - **Disagree**   ***لا اوافق***   - **Don’t know**   **لا أعلم** |
| 28 | **Bee venom acupuncture therapy is considered as an expensive treatment in comparison with your typical medication that you used to take or already taken to treat your diseases**  **يعتبر علاج الوخز بسم النحل علاجًا مكلفًا مقارنة بالأدوية النموذجية التي استخدمتها أو تناولتها لعلاج مرضك او أمراضك؟**   - **Agree**   ***موافق***   - **Disagree**   ***لا اوافق***   - **Don’t know**   **لا أعلم** |
| 29 | **Would you take Bee venom acupuncture therapy?**  **لماذا استخدمت علاج الوخز بسم النحل؟**   - **To boost your immune system**   ***لتقوية جهاز المناعة لديك***   - **For a specific disease**   **لمرض معين**   - **For beauty purposes**   **لأغراض التجميل**   - **Other please specify ( )**   **أخرى ارجو التحديد ( )** |
| **Practice part:**  **الجزء التطبيقي:**  **ال**  30 | **If you are using Bee venom acupuncture therapy, How many stings do you take?**  **إذا كنت تستخدم علاج الوخز بسم النحل، فكم عدد اللدغات التي تأخذها؟**   - **5 times**   **٥ مرات**   - **10 times**   **١٠ مرات**   - **15 times**   **١٥ مرة**   - **More than 15 times**   **أكثر من ١٥ مرة** |
| 31 | **Where do you take the stings in your body?**  **آين تأخذ اللدغات في جسدك؟**   - **Head**   **الرأس**   - **Neck**   **الرقبة**   - **Hands**   **الايدي**   - **Feet**   **الاقدام**   - **Other please specify**   **أخرى ارجو التحديد** |
| 32 | **For how many session do you take Bee venom acupuncture therapy in a week?**  **كم جلسة تأخذ في الأسبوع؟**   - **One session**   **جلسة واحدة**   - **3 sessions**   **٣ جلسات**   - **5 sessions**   **٥ جلسات**   - **More than 5 sessions**   **أكثر من ٥ جلسات** |
| 33 | **For how long do you take Bee venom acupuncture therapy?**  **الى متى يستمر علاجك بالوخز بسم النحل؟**   - **1-3 months**   **١-٣ أشهر**   - **2-4 months**   **٢-٤ أشهر**   - **3-6 months**   **٣-٦ أشهر**   - **Don’t know**   **لا أعلم** |
| 34 | **What type of side effects if any?**  **ما نوع الآثار الجانبية ان وجدت؟**   - **Skin inflammation at the site of acupuncture**   **التهاب الجلد في موقع الخوز**   - **Fever**   **حمى**   - **Allergic reaction**   **رد فعل تحسسي**   - **All of the above**   **جميع ما سبق** |
| 35 | **Where do you take the Bee venom acupuncture therapy?**  **اين تأخذ علاج الوخز بسم النحل؟**   - **Clinic**   **في عيادة**   - **Centre for treatment with bee venom acupuncture**   ***في مركز للعلاج بالوخز بسم النحل***   - **Other please specify ( )**   ***أخرى ارجو التحديد ( )*** |
| 36 | **Does your disease improved by taking Bee venom acupuncture therapy only or with medicines?**  ***هل تحسن مرضك بعلاج الوخز بسم النحل فقط أم بالأدوية؟***   - **Improved with bee venom acupuncture only**   ***تحسن بالوخز بسم النحل فقط***   - **Improved with bee venom acupuncture and medications**   ***تحسن بالوخز بسم النحل و الأدوية*** |
| 37 | **Did you ask to do radiology or lab analysis before and after Bee venom acupuncture therapy treatment?**  **هل طلبت إجراء الأشعة أو التحاليل المخبرية قبل العلاج بالوخز بسم النحل وبعده؟**   - **Yes**   **نعم**   - **No**   ***لا*** |
| 38 | **Are you using the complementary substances that contain pollen, royal jelly and honey wax?**  ***هل تستخدم المواد التكميلية التي تحتوي على حبوب اللقاح وغذاء ملكات النحل وشمع العسل؟***   - **Yes**   ***نعم***   - **No**   ***لا*** |
| 39 | **If yes, how much of each do you take per day?**  **إذا كانت الإجابة بنعم، فما المقدار الذي تتناوله يوميًا؟**   - **1 time**   **مرة واحدة**   - **2 times**   **مرتين**   - **3 times**   **٣ مرات**   - **More than three times**   ***أكثر من ثلاث مرات***   - **Not taken any**   ***لا تتناولها*** |
| 40 | **What do you feel after using Bee venom acupuncture therapy?**  **ما هو شعورك بعد استخدام علاج الوخز بسم النحل؟**   - **Improved**   **تحسنت**   - **Cured**   **تعالجت**   - **No change**   ***لم يتغير شيء*** |
| 41 | **Do you recommend Bee venom acupuncture therapy?**  **هل تنصح باستخدام علاج الوخز بسم النحل؟**   - **Yes**   ***نعم***   - **No**   ***لا*** |

**If you want to add any comments or feedback, please write in the box below:**

***إذا* *كنت ترغب في إضافة أي تعليقات أو ملاحظات ، يرجى الكتابة في المربع أدناه:***
